# Supplementary material for: In vitro protein and starch digestion kinetics of individual chickpea cells: from static to more complex in vitro digestion approaches
Source: Royal Society of Chemistry journal article supplement (doi:10.1039/d1fo01123e), 2021-01-01
Supplement: d1fo01123e1.pdf [file d1fo01123e1.pdf]

## Electronic supplementary information

### Figure

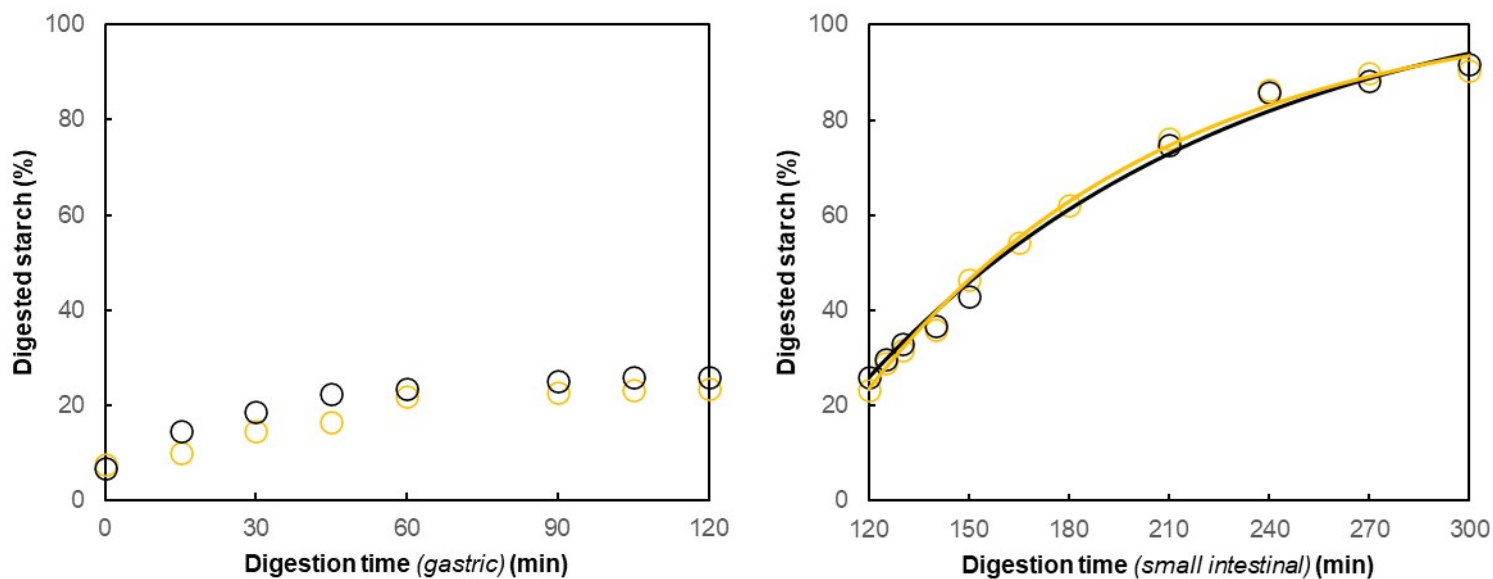

Figure.S1. *In vitro* starch digestion kinetics of individual cotyledon cells from chickpeas during gastric and small intestinal digestion digested with human salivary  $\alpha$ -amylase ( $\circ$ ) and  $\alpha$ -amylase from porcine origin coupled to the gradual gastric pH ( $\circ$ ). Symbols represent experimental values, while lines represent values predicted by fractional conversion model shown (Eq. (6)).

## Tables

Table.S1. Estimated kinetic parameters of *in vitro* protein digestion of individual cotyledon cells from chickpeas during gastric and small intestinal digestion with the harmonized INFOGEST protocol (pH 3). Digested protein (%) was evaluated determining the digested soluble protein, readily bioaccessible<sub>hydrolyzed</sub>, and readily bioaccessible protein fraction. Protein digestion kinetic parameters were estimated by a fractional conversion model (Eq. (6)). Values are estimates  $\pm$  standard errors. Mean values (within a column) with different superscript letters are significantly different based on 95% confidence intervals.

| Digestion condition                    | <i>in vitro</i> protein digestion kinetics |                               |                               |                                                     |                               |                               |                                |                               |                               |
|----------------------------------------|--------------------------------------------|-------------------------------|-------------------------------|-----------------------------------------------------|-------------------------------|-------------------------------|--------------------------------|-------------------------------|-------------------------------|
|                                        | Readily bioaccessible protein              |                               |                               | Readily bioaccessible <sub>hydrolyzed</sub> protein |                               |                               | Digested soluble protein       |                               |                               |
|                                        | $k$ (min <sup>-1</sup> )                   | Protein <sub>final</sub> (%)  | R <sup>2</sup> <sub>adj</sub> | $k$ (min <sup>-1</sup> )                            | Protein <sub>final</sub> (%)  | R <sup>2</sup> <sub>adj</sub> | $k$ (min <sup>-1</sup> )       | Protein <sub>final</sub> (%)  | R <sup>2</sup> <sub>adj</sub> |
| pH 3 <sub>gastric phase</sub>          | 0.021 $\pm$ 0.003 <sup>a</sup>             | 4.46 $\pm$ 0.28 <sup>a</sup>  | 0.99                          | 0.046 $\pm$ 0.012 <sup>a</sup>                      | 10.99 $\pm$ 0.71 <sup>a</sup> | 0.99                          | 0.028 $\pm$ 0.004 <sup>a</sup> | 30.68 $\pm$ 1.24 <sup>a</sup> | 0.99                          |
| pH 3 <sub>small intestinal phase</sub> | 0.023 $\pm$ 0.004 <sup>a</sup>             | 32.58 $\pm$ 1.77 <sup>b</sup> | 0.99                          | 0.031 $\pm$ 0.002 <sup>a</sup>                      | 67.01 $\pm$ 1.22 <sup>b</sup> | 0.99                          | 0.020 $\pm$ 0.003 <sup>a</sup> | 85.49 $\pm$ 2.77 <sup>b</sup> | 0.99                          |

Table.S2. Estimated kinetic parameters of *in vitro* starch digestion of individual cotyledon cells from chickpeas during gastric and small intestinal digestion digested at different static gastric pH levels pH 2, pH 3 and pH 6. Starch digestion kinetic parameters were estimated by a fractional conversion model (Eq. (6)). Values are estimates  $\pm$  standard errors. Mean values (within a column) with different superscript letters are significantly different based on 95% confidence intervals.

| Digestion condition | <i>in vitro</i> starch digestion kinetics (small intestinal) |                               |                               |                                                   |
|---------------------|--------------------------------------------------------------|-------------------------------|-------------------------------|---------------------------------------------------|
|                     | $k$ (min <sup>-1</sup> )                                     | Starch <sub>final</sub> (%)   | R <sup>2</sup> <sub>adj</sub> | Initial reaction rate<br>(% * min <sup>-1</sup> ) |
| pH 2                | 0.020 $\pm$ 0.001 <sup>a</sup>                               | 79.00 $\pm$ 1.37 <sup>a</sup> | 0.99                          | 1.54 $\pm$ 0.08 <sup>a</sup>                      |
| pH 3                | 0.018 $\pm$ 0.001 <sup>a</sup>                               | 68.56 $\pm$ 1.24 <sup>b</sup> | 0.99                          | 1.20 $\pm$ 0.06 <sup>b</sup>                      |
| pH 6                | 0.016 $\pm$ 0.002 <sup>a</sup>                               | 65.84 $\pm$ 3.36 <sup>b</sup> | 0.99                          | 1.03 $\pm$ 0.14 <sup>c</sup>                      |

Table.S3. Estimated kinetic parameters of *in vitro* protein digestion of individual cotyledon cells from chickpeas during gastric and small intestinal digestion digested at different static gastric pH levels pH 2 and pH 3. Starch and protein digestion kinetic parameters were estimated by a fractional conversion model (Eq. (6)). Values are estimates  $\pm$  standard errors. Mean values (within a column) with different superscript letters are significantly different based on 95% confidence intervals.

| Digestion condition | <i>in vitro</i> protein digestion kinetics (gastric) |                               |                               |                                                |                                                     |                               |                               |                                                |
|---------------------|------------------------------------------------------|-------------------------------|-------------------------------|------------------------------------------------|-----------------------------------------------------|-------------------------------|-------------------------------|------------------------------------------------|
|                     | Readily bioaccessible protein                        |                               |                               |                                                | Readily bioaccessible <sub>hydrolyzed</sub> protein |                               |                               |                                                |
|                     | $k$ (min <sup>-1</sup> )                             | Protein <sub>final</sub> (%)  | R <sup>2</sup> <sub>adj</sub> | Initial reaction rate (% * min <sup>-1</sup> ) | $k$ (min <sup>-1</sup> )                            | Protein <sub>final</sub> (%)  | R <sup>2</sup> <sub>adj</sub> | Initial reaction rate (% * min <sup>-1</sup> ) |
| pH 2                | 0.023 $\pm$ 0.002 <sup>a</sup>                       | 10.58 $\pm$ 0.44 <sup>a</sup> | 0.99                          | 0.10 $\pm$ 0.01 <sup>a</sup>                   | 0.038 $\pm$ 0.005 <sup>a</sup>                      | 51.87 $\pm$ 2.30 <sup>a</sup> | 0.99                          | 1.95 $\pm$ 0.27 <sup>a</sup>                   |
| pH 3                | 0.021 $\pm$ 0.003 <sup>a</sup>                       | 4.46 $\pm$ 0.28 <sup>b</sup>  | 0.99                          | 0.25 $\pm$ 0.02 <sup>b</sup>                   | 0.046 $\pm$ 0.012 <sup>a</sup>                      | 10.99 $\pm$ 0.71 <sup>b</sup> | 0.99                          | 0.69 $\pm$ 0.19 <sup>b</sup>                   |

Table.S4: Estimated kinetic parameters of *in vitro* protein digestion of individual cotyledon cells from chickpeas during gastric and small intestinal digestion digested at different static gastric pH levels pH 2, pH 3 and pH 6. Protein digestion kinetic parameters were estimated by a fractional conversion model (Eq. (6)). Values are estimates  $\pm$  standard errors. Mean values (within a column) with different superscript letters are significantly different based on 95% confidence intervals.

| Digestion condition | <i>in vitro</i> protein digestion kinetics (small intestinal) |                               |                               |                                                   |                                                     |                                |                               |                                                   |
|---------------------|---------------------------------------------------------------|-------------------------------|-------------------------------|---------------------------------------------------|-----------------------------------------------------|--------------------------------|-------------------------------|---------------------------------------------------|
|                     | Readily bioaccessible protein                                 |                               |                               |                                                   | Readily bioaccessible <sub>hydrolyzed</sub> protein |                                |                               |                                                   |
|                     | $k$ (min <sup>-1</sup> )                                      | Protein <sub>final</sub> (%)  | R <sup>2</sup> <sub>adj</sub> | Initial reaction rate<br>(% * min <sup>-1</sup> ) | $k$ (min <sup>-1</sup> )                            | Protein <sub>final</sub> (%)   | R <sup>2</sup> <sub>adj</sub> | Initial reaction rate<br>(% * min <sup>-1</sup> ) |
| pH 2                | 0.011 $\pm$ 0.001 <sup>a</sup>                                | 38.38 $\pm$ 1.66 <sup>a</sup> | 0.99                          | 0.32 $\pm$ 0.04 <sup>a</sup>                      | 0.007 $\pm$ 0.003 <sup>a</sup>                      | 92.92 $\pm$ 12.76 <sup>a</sup> | 0.99                          | 0.26 $\pm$ 0.13 <sup>a</sup>                      |
| pH 3                | 0.023 $\pm$ 0.004 <sup>a</sup>                                | 32.58 $\pm$ 1.77 <sup>a</sup> | 0.99                          | 0.65 $\pm$ 0.11 <sup>b</sup>                      | 0.031 $\pm$ 0.002 <sup>b</sup>                      | 67.01 $\pm$ 1.22 <sup>b</sup>  | 0.99                          | 1.70 $\pm$ 0.12 <sup>b</sup>                      |
| pH 6                | 0.012 $\pm$ 0.004 <sup>a</sup>                                | 34.64 $\pm$ 5.27 <sup>a</sup> | 0.98                          | 0.41 $\pm$ 0.14 <sup>c</sup>                      | -                                                   | -                              | -                             | -                                                 |
